# Supplementary material
Source: publisher figshare collection journal article supplement (https://tandf.figshare.com/articles/dataset/_/1629376)
Supplement: Supplementary file 1 [file 1]

## Provenance of the Ordovician–lower Silurian Tumblagooda Sandstone, Western Australia

Y. A. KETTANAH<sup>1,2\*</sup>, A. J. MORY<sup>3,4</sup>, G. D. WACH<sup>2</sup> AND M. T. D. WINGATE<sup>3,5</sup>

<sup>1</sup> Department of Geology, Salahaddin University, Kirkuk Rd, Erbil, Kurdistan, Iraq

<sup>2</sup> Department of Earth Sciences, Dalhousie University, 1459 Oxford St, Halifax, NS B3H 4R2, Canada

<sup>3</sup> Geological Survey of Western Australia, 100 Plain St, East Perth, WA 6004, Australia

<sup>4</sup> Centre for Energy Geoscience, The University of Western Australia, 35 Stirling Highway Crawley, WA 6009, Australia

<sup>5</sup> School of Earth and Environment, The University of Western Australia, 35 Stirling Highway Crawley, WA 6009, Australia

\*Corresponding author: kettanah@dal.ca

### SUPPLEMENTARY PAPERS

*Australian Journal of Earth Sciences* (2015) **62**, 817–830  
<http://dx.doi.org/10.1080/08120099.2015.1117020>

---

Copies of Supplementary Papers may be obtained from the Geological Society of Australia's website ([www.gsa.org.au](http://www.gsa.org.au)), the Australian Journal of Earth Sciences website ([www.ajes.com.au](http://www.ajes.com.au)) or from the National Library of Australia's Pandora archive (<http://nla.gov.au/nla.arc-25194>).

---

### SUPPLEMENTARY PAPERS

**Table 1** Grain counts for the Tumblagooda Sandstone: Qt (total quartzose grains) = Qm (monocrystalline quartz >62.5 µm + polycrystalline quartz such as quartzite >62.5 µm) + Qp (polycrystalline quartz such as chert >62.5 µm); F (total feldspar grains); L (unstable rock fragments = Lithics).

**Table 2** Chemical composition (wt%) for tourmalines of Tumblagooda Sandstone (samples GSWA 118300: grains 1 to 34 and GSWA 1813266: grains 35 to 68).

**Table 3** Tourmaline analyses from Tumblagooda Sandstone, the Capricorn Orogen, Yilgarn Craton and the Pilbara Craton.

Table 1 Grain counts for the Tumblagooda Sandstone; Quartzose grains: Qt (total quartzose grains) = Qm (monocrystalline quartz >62.5 µm + polycrystalline quartz such as quartzite >62.5 µm) + Qp (polycrystalline quartz such as chert >62.5 µm); feldspar grains: F (total feldspar grains); L (unstable rock fragments = Lithics).

| Studied Section         | Sample Number | Depth or Height (m) | Qt     |           |       | F          |             | L     | Minerals  |         |          |        |            |        |        | Cement |         |            |        | Total Counts |
|-------------------------|---------------|---------------------|--------|-----------|-------|------------|-------------|-------|-----------|---------|----------|--------|------------|--------|--------|--------|---------|------------|--------|--------------|
|                         |               |                     | Qm     | Qp        |       |            |             |       | Muscovite | Biotite | Chlorite | Opaque | Tourmaline | Zircon | Rutile | Clay   | Calcite | Iron oxide | Quartz |              |
|                         |               |                     | Quartz | Quartzite | Chert | K-Feldspar | Plagioclase | Slate |           |         |          |        |            |        |        |        |         |            |        |              |
| Red Bluff Coastal range | 181284        | 23.50               | 449    | 24        | 1     | 74         | 1           | 0     | 4         | 0       | 0        | 0      | 0          | 0      | 0      | 24     | 0       | 0          | 24     | 600          |
|                         | 181283        | 23.00               | 258    | 2         | 0     | 53         | 1           | 0     | 3         | 1       | 0        | 5      | 1          | 1      | 0      | 4      | 0       | 270        | 0      | 600          |
|                         | 181282        | 21.00               | 308    | 6         | 0     | 57         | 0           | 0     | 8         | 2       | 0        | 24     | 2          | 0      | 0      | 0      | 0       | 193        | 0      | 600          |
|                         | 181281        | 20.00               | 346    | 4         | 1     | 92         | 2           | 0     | 2         | 0       | 0        | 0      | 5          | 17     | 2      | 129    | 0       | 0          | 0      | 600          |
|                         | 181280        | 19.80               | 362    | 16        | 0     | 58         | 0           | 0     | 1         | 0       | 0        | 0      | 0          | 0      | 0      | 6      | 0       | 0          | 158    | 600          |
|                         | 181279        | 18.50               | 393    | 102       | 4     | 49         | 0           | 0     | 0         | 0       | 0        | 0      | 0          | 0      | 1      | 6      | 0       | 0          | 45     | 600          |
|                         | 181278        | 17.80               | 469    | 64        | 2     | 58         | 0           | 0     | 0         | 0       | 0        | 0      | 0          | 0      | 0      | 7      | 0       | 0          | 0      | 600          |
|                         | 181262        | 17.75               | 287    | 4         | 0     | 38         | 0           | 0     | 1         | 0       | 0        | 11     | 0          | 0      | 0      | 19     | 0       | 240        | 0      | 600          |
|                         | 181277        | 17.40               | 324    | 6         | 0     | 53         | 1           | 0     | 4         | 4       | 0        | 0      | 0          | 1      | 0      | 0      | 0       | 206        | 0      | 600          |
|                         | 181276        | 16.75               | 289    | 13        | 1     | 53         | 0           | 0     | 1         | 1       | 0        | 18     | 1          | 1      | 0      | 78     | 0       | 143        | 0      | 600          |
|                         | 181275        | 16.00               | 261    | 6         | 0     | 19         | 1           | 0     | 1         | 0       | 0        | 0      | 1          | 2      | 0      | 15     | 0       | 294        | 0      | 600          |
|                         | 181274        | 13.70               | 497    | 10        | 3     | 28         | 0           | 0     | 5         | 0       | 0        | 0      | 3          | 1      | 1      | 52     | 0       | 0          | 0      | 600          |
|                         | 181273        | 13.50               | 344    | 19        | 1     | 43         | 0           | 0     | 0         | 0       | 0        | 1      | 0          | 0      | 0      | 4      | 0       | 188        | 0      | 600          |
|                         | 181272        | 12.20               | 339    | 98        | 2     | 52         | 0           | 0     | 1         | 0       | 0        | 0      | 0          | 0      | 0      | 40     | 0       | 0          | 67     | 600          |
|                         | 181271        | 11.50               | 289    | 9         | 1     | 45         | 0           | 0     | 2         | 1       | 0        | 38     | 1          | 0      | 0      | 14     | 0       | 199        | 0      | 600          |
|                         | 181300        | 11.01               | 355    | 8         | 2     | 44         | 0           | 0     | 1         | 0       | 0        | 23     | 2          | 2      | 1      | 18     | 0       | 144        | 0      | 600          |
|                         | 181270        | 11.00               | 460    | 32        | 0     | 38         | 1           | 0     | 0         | 0       | 0        | 0      | 0          | 0      | 0      | 39     | 0       | 0          | 30     | 600          |
|                         | 181269        | 10.25               | 407    | 57        | 0     | 26         | 1           | 0     | 0         | 0       | 0        | 0      | 0          | 0      | 0      | 38     | 0       | 0          | 71     | 600          |
|                         | 181267        | 9.50                | 446    | 61        | 1     | 36         | 0           | 0     | 0         | 0       | 0        | 0      | 0          | 0      | 0      | 24     | 0       | 0          | 32     | 600          |
|                         | 181268        | 9.00                | 493    | 20        | 0     | 24         | 0           | 0     | 0         | 0       | 0        | 0      | 0          | 0      | 0      | 34     | 0       | 0          | 29     | 600          |
|                         | 181288        | 8.50                | 502    | 14        | 2     | 62         | 0           | 0     | 3         | 2       | 0        | 0      | 0          | 0      | 0      | 14     | 0       | 0          | 0      | 600          |
| 181265                  | 6.25          | 390                 | 40     | 0         | 49    | 0          | 0           | 3     | 0         | 0       | 0        | 0      | 0          | 0      | 20     | 0      | 0       | 98         | 600    |              |
| 181266                  | 6.25          | 324                 | 115    | 0         | 22    | 1          | 0           | 0     | 0         | 0       | 0        | 0      | 0          | 0      | 26     | 0      | 110     | 2          | 600    |              |
| 181264                  | 5.25          | 386                 | 46     | 1         | 35    | 0          | 0           | 0     | 0         | 0       | 0        | 0      | 0          | 0      | 18     | 0      | 69      | 45         | 600    |              |
| 181287                  | 3.80          | 432                 | 8      | 1         | 72    | 2          | 0           | 13    | 6         | 0       | 0        | 0      | 0          | 0      | 65     | 0      | 0       | 0          | 600    |              |
| 181286                  | 1.50          | 352                 | 66     | 1         | 36    | 2          | 0           | 0     | 0         | 0       | 1        | 0      | 1          | 0      | 9      | 0      | 69      | 62         | 600    |              |
| Eagle Gorge             | GW100         | x                   | 423    | 37        | 3     | 3          | 0           | 0     | 0         | 3       | 0        | 0      | 0          | 0      | 0      | 93     | 0       | 0          | 37     | 600          |
|                         | GW101         | x                   | 368    | 25        | 0     | 6          | 6           | 0     | 0         | 0       | 0        | 0      | 3          | 3      | 0      | 97     | 0       | 25         | 66     | 600          |
|                         | GW102         | x                   | 581    | 0         | 0     | 0          | 0           | 0     | 0         | 0       | 0        | 0      | 0          | 0      | 0      | 0      | 0       | 0          | 19     | 600          |
|                         | GW103         | x                   | 344    | 3         | 0     | 12         | 0           | 0     | 0         | 3       | 0        | 0      | 0          | 0      | 0      | 164    | 0       | 3          | 70     | 600          |
|                         | GW104         | x                   | 431    | 7         | 0     | 0          | 0           | 0     | 0         | 0       | 0        | 0      | 0          | 0      | 0      | 50     | 0       | 50         | 63     | 600          |
|                         | GW105         | x                   | 324    | 0         | 0     | 12         | 0           | 0     | 0         | 0       | 0        | 0      | 0          | 0      | 0      | 0      | 0       | 264        | 0      | 600          |
| Wendy-1 well            | 193112        | 317.90              | 502    | 9         | 0     | 15         | 0           | 0     | 12        | 3       | 0        | 3      | 0          | 0      | 0      | 55     | 0       | 0          | 0      | 600          |
|                         | 193113        | 319.60              | 372    | 12        | 0     | 69         | 27          | 6     | 9         | 0       | 3        | 0      | 3          | 0      | 0      | 99     | 0       | 0          | 0      | 600          |
|                         | 193114        | 378.40              | 360    | 0         | 0     | 66         | 39          | 0     | 24        | 0       | 3        | 0      | 0          | 0      | 0      | 108    | 0       | 0          | 0      | 600          |
|                         | 193115        | 381.40              | 285    | 0         | 0     | 30         | 21          | 0     | 57        | 0       | 0        | 0      | 0          | 0      | 0      | 108    | 54      | 45         | 0      | 600          |
|                         | 193117        | 470.90              | 324    | 0         | 0     | 27         | 42          | 0     | 0         | 0       | 0        | 0      | 0          | 0      | 0      | 165    | 33      | 9          | 0      | 600          |
|                         | 193118        | 481.50              | 354    | 0         | 0     | 45         | 36          | 0     | 9         | 0       | 0        | 0      | 3          | 0      | 0      | 114    | 36      | 3          | 0      | 600          |
|                         | 193119        | 557.20              | 339    | 0         | 0     | 33         | 42          | 0     | 12        | 0       | 0        | 0      | 0          | 0      | 0      | 12     | 0       | 162        | 0      | 600          |
|                         | 193120        | 607.10              | 553    | 3         | 0     | 9          | 3           | 0     | 0         | 0       | 0        | 6      | 3          | 3      | 0      | 16     | 3       | 0          | 0      | 600          |
|                         | 193121        | 612.10              | 303    | 3         | 0     | 21         | 9           | 0     | 0         | 0       | 0        | 9      | 3          | 3      | 0      | 152    | 67      | 30         | 0      | 600          |
|                         | 193123        | 649.50              | 537    | 6         | 0     | 0          | 0           | 0     | 3         | 0       | 0        | 0      | 0          | 0      | 0      | 30     | 0       | 24         | 0      | 600          |
|                         | 193124        | 741.50              | 507    | 6         | 0     | 75         | 12          | 0     | 0         | 0       | 0        | 0      | 0          | 0      | 0      | 0      | 0       | 0          | 0      | 600          |
|                         | 193126        | 825.50              | 447    | 6         | 0     | 51         | 30          | 0     | 0         | 9       | 0        | 0      | 0          | 3      | 0      | 15     | 0       | 3          | 36     | 600          |
|                         | 193127        | 827.90              | 255    | 0         | 3     | 33         | 3           | 0     | 0         | 0       | 0        | 3      | 0          | 3      | 0      | 0      | 0       | 294        | 6      | 600          |
|                         | 193128        | 832.30              | 384    | 3         | 0     | 60         | 24          | 0     | 9         | 39      | 0        | 0      | 0          | 0      | 0      | 12     | 0       | 39         | 30     | 600          |
|                         | 193129        | 851.70              | 411    | 3         | 0     | 45         | 27          | 0     | 6         | 0       | 0        | 12     | 3          | 3      | 0      | 0      | 0       | 81         | 9      | 600          |
|                         | 193131        | 895.50              | 333    | 9         | 0     | 126        | 9           | 0     | 3         | 3       | 0        | 0      | 0          | 0      | 0      | 9      | 0       | 18         | 90     | 600          |
|                         | 193132        | 906.60              | 378    | 3         | 0     | 84         | 0           | 0     | 0         | 0       | 0        | 3      | 0          | 0      | 0      | 0      | 0       | 132        | 0      | 600          |
|                         | 193133        | 915.70              | 453    | 0         | 0     | 45         | 18          | 0     | 0         | 0       | 0        | 0      | 0          | 9      | 0      | 0      | 0       | 75         | 0      | 600          |
|                         | 193134        | 926.60              | 369    | 9         | 0     | 48         | 6           | 0     | 0         | 0       | 0        | 0      | 0          | 0      | 0      | 138    | 0       | 30         | 0      | 600          |
|                         | 193135        | 951.50              | 288    | 0         | 0     | 45         | 6           | 0     | 0         | 0       | 0        | 0      | 0          | 0      | 0      | 9      | 0       | 252        | 0      | 600          |
|                         | 193136        | 966.60              | 363    | 12        | 0     | 0          | 0           | 0     | 0         | 0       | 0        | 0      | 0          | 0      | 0      | 42     | 12      | 147        | 24     | 600          |
|                         | 193137        | 976.90              | 348    | 12        | 0     | 30         | 0           | 0     | 3         | 0       | 0        | 0      | 0          | 0      | 0      | 72     | 0       | 105        | 30     | 600          |
|                         | 193138        | 1014.60             | 387    | 9         | 3     | 21         | 15          | 0     | 0         | 0       | 0        | 0      | 0          | 0      | 0      | 24     | 0       | 126        | 15     | 600          |
|                         | 193139        | 1054.30             | 314    | 9         | 3     | 0          | 0           | 0     | 0         | 0       | 0        | 3      | 3          | 3      | 0      | 44     | 0       | 201        | 19     | 600          |
|                         | 193140        | 1085.70             | 407    | 13        | 3     | 3          | 0           | 0     | 0         | 0       | 0        | 3      | 0          | 3      | 0      | 33     | 0       | 107        | 27     | 600          |
|                         | 193141        | 1092.50             | 309    | 16        | 3     | 0          | 0           | 0     | 0         | 0       | 0        | 0      | 0          | 0      | 0      | 51     | 0       | 155        | 66     | 600          |
|                         | 193142        | 1132.90             | 442    | 6         | 0     | 3          | 0           | 0     | 0         | 0       | 0        | 0      | 0          | 0      | 0      | 64     | 0       | 55         | 30     | 600          |
|                         | 193143        | 1151.20             | 430    | 10        | 3     | 40         | 7           | 0     | 0         | 0       | 0        | 3      | 3          | 3      | 0      | 17     | 0       | 33         | 50     | 600          |
|                         | 193144        | 1194.60             | 466    | 13        | 10    | 41         | 0           | 0     | 0         | 0       | 0        | 0      | 0          | 0      | 0      | 57     | 0       | 3          | 10     | 600          |
|                         | 193145        | 1206.10             | 392    | 16        | 0     | 16         | 6           | 0     | 0         | 0       | 0        | 0      | 0          | 0      | 0      | 16     | 0       | 114        | 41     | 600          |
|                         | 193146        | 1216.20             | 298    | 0         | 0     | 36         | 18          | 0     | 3         | 87      | 0        | 15     | 0          | 0      | 0      | 139    | 0       | 3          | 0      | 600          |

Table 2 Chemical composition (wt%) for tourmalines of Tumblagooda Sandstone (samples GSWA 118300: grains 1 to 34 and GSWA 1813266: grains 35 to 68).

| Grain No. | Weight %                      |                  |                  |                                |       |      |      |      |                   |                  |        | Atom per formula units based on 29 oxygens |      |      |      |      |      |      |      |      |      |       | Tourmaline |  |
|-----------|-------------------------------|------------------|------------------|--------------------------------|-------|------|------|------|-------------------|------------------|--------|--------------------------------------------|------|------|------|------|------|------|------|------|------|-------|------------|--|
|           | B <sub>2</sub> O <sub>3</sub> | SiO <sub>2</sub> | TiO <sub>2</sub> | Al <sub>2</sub> O <sub>3</sub> | FeO   | MnO  | MgO  | CaO  | Na <sub>2</sub> O | K <sub>2</sub> O | Total% | B                                          | Si   | Ti   | Al   | Fe   | Mn   | Mg   | Ca   | Na   | K    | Total | Type       |  |
| 1         | 10.71                         | 37.00            | 0.56             | 32.96                          | 3.41  | 0.02 | 8.28 | 0.56 | 2.11              | 0.03             | 95.65  | 3.00                                       | 6.00 | 0.07 | 6.30 | 0.46 | 0.00 | 2.00 | 0.10 | 0.66 | 0.01 | 18.61 | Dravite    |  |
| 2         | 10.49                         | 35.53            | 0.38             | 34.75                          | 10.56 | 0.06 | 2.57 | 0.30 | 1.77              | 0.06             | 96.46  | 3.00                                       | 5.89 | 0.05 | 6.79 | 1.46 | 0.01 | 0.64 | 0.05 | 0.57 | 0.01 | 18.46 | Schorl     |  |
| 3         | 10.64                         | 35.35            | 1.16             | 33.89                          | 6.44  | 0.01 | 6.04 | 1.55 | 1.53              | 0.08             | 96.68  | 3.00                                       | 5.78 | 0.14 | 6.53 | 0.88 | 0.00 | 1.47 | 0.27 | 0.49 | 0.02 | 18.57 | Dravite    |  |
| 4         | 10.74                         | 37.09            | 0.39             | 32.86                          | 4.86  | 0.01 | 7.86 | 1.25 | 1.41              | 0.04             | 96.49  | 3.00                                       | 6.00 | 0.05 | 6.27 | 0.66 | 0.00 | 1.90 | 0.22 | 0.44 | 0.01 | 18.54 | Dravite    |  |
| 5         | 10.42                         | 35.62            | 1.28             | 31.31                          | 10.41 | 0.06 | 4.55 | 0.98 | 1.82              | 0.05             | 96.48  | 3.00                                       | 5.94 | 0.16 | 6.15 | 1.45 | 0.01 | 1.13 | 0.18 | 0.59 | 0.01 | 18.62 | Schorl     |  |
| 6         | 10.71                         | 36.58            | 0.65             | 33.89                          | 5.67  | 0.04 | 6.54 | 0.77 | 1.57              | 0.02             | 96.45  | 3.00                                       | 5.94 | 0.08 | 6.48 | 0.77 | 0.01 | 1.58 | 0.13 | 0.50 | 0.00 | 18.49 | Dravite    |  |
| 7         | 10.56                         | 36.64            | 0.51             | 30.69                          | 6.48  | 0.03 | 7.92 | 1.30 | 1.99              | 0.03             | 96.14  | 3.00                                       | 6.03 | 0.06 | 5.95 | 0.89 | 0.00 | 1.94 | 0.23 | 0.63 | 0.01 | 18.75 | Dravite    |  |
| 8         | 10.58                         | 36.16            | 0.74             | 33.18                          | 7.49  | 0.02 | 5.49 | 0.60 | 1.92              | 0.04             | 96.24  | 3.00                                       | 5.94 | 0.09 | 6.43 | 1.03 | 0.00 | 1.34 | 0.11 | 0.61 | 0.01 | 18.56 | Dravite    |  |
| 9         | 10.55                         | 35.33            | 1.25             | 34.16                          | 8.55  | 0.02 | 4.15 | 0.95 | 1.36              | 0.04             | 96.36  | 3.00                                       | 5.82 | 0.16 | 6.64 | 1.18 | 0.00 | 1.02 | 0.17 | 0.44 | 0.01 | 18.43 | Schorl     |  |
| 10        | 10.30                         | 35.18            | 0.18             | 33.98                          | 13.67 | 0.16 | 0.74 | 0.08 | 1.80              | 0.05             | 96.15  | 3.00                                       | 5.93 | 0.02 | 6.76 | 1.93 | 0.02 | 0.19 | 0.01 | 0.59 | 0.01 | 18.46 | Schorl     |  |
| 11        | 10.65                         | 36.24            | 0.71             | 33.57                          | 8.24  | 0.02 | 5.21 | 0.63 | 1.92              | 0.03             | 97.22  | 3.00                                       | 5.91 | 0.09 | 6.46 | 1.12 | 0.00 | 1.27 | 0.11 | 0.61 | 0.01 | 18.58 | Dravite    |  |
| 12        | 10.37                         | 35.04            | 0.95             | 30.11                          | 10.65 | 0.07 | 6.05 | 1.61 | 1.78              | 0.08             | 96.69  | 3.00                                       | 5.87 | 0.12 | 5.95 | 1.49 | 0.01 | 1.51 | 0.29 | 0.58 | 0.02 | 18.83 | Dravite    |  |
| 13        | 10.34                         | 35.31            | 0.72             | 32.87                          | 10.91 | 0.10 | 2.79 | 0.56 | 1.94              | 0.07             | 95.60  | 3.00                                       | 5.94 | 0.09 | 6.51 | 1.53 | 0.01 | 0.70 | 0.10 | 0.63 | 0.01 | 18.54 | Schorl     |  |
| 14        | 10.53                         | 36.35            | 0.33             | 30.99                          | 7.33  | 0.04 | 7.47 | 1.11 | 2.06              | 0.03             | 96.25  | 3.00                                       | 6.00 | 0.04 | 6.03 | 1.01 | 0.01 | 1.84 | 0.20 | 0.66 | 0.01 | 18.78 | Dravite    |  |
| 15        | 10.46                         | 36.29            | 0.66             | 30.13                          | 7.70  | 0.03 | 7.19 | 1.52 | 1.87              | 0.02             | 95.86  | 3.00                                       | 6.03 | 0.08 | 5.90 | 1.07 | 0.00 | 1.78 | 0.27 | 0.60 | 0.00 | 18.74 | Dravite    |  |
| 16        | 10.27                         | 35.27            | 1.06             | 27.54                          | 9.96  | 0.04 | 7.48 | 3.06 | 1.13              | 0.09             | 95.89  | 3.00                                       | 5.97 | 0.14 | 5.49 | 1.41 | 0.01 | 1.89 | 0.55 | 0.37 | 0.02 | 18.84 | Uvite      |  |
| 17        | 10.60                         | 36.11            | 0.47             | 34.26                          | 9.09  | 0.07 | 4.03 | 0.11 | 2.14              | 0.06             | 96.94  | 3.00                                       | 5.92 | 0.06 | 6.62 | 1.25 | 0.01 | 0.99 | 0.02 | 0.68 | 0.01 | 18.56 | Schorl     |  |
| 18        | 10.18                         | 34.75            | 0.67             | 31.11                          | 14.78 | 0.14 | 1.75 | 0.80 | 2.05              | 0.08             | 96.30  | 3.00                                       | 5.93 | 0.09 | 6.26 | 2.11 | 0.02 | 0.45 | 0.15 | 0.68 | 0.02 | 18.70 | Schorl     |  |
| 19        | 10.54                         | 35.83            | 0.27             | 34.26                          | 8.35  | 0.05 | 4.47 | 0.67 | 1.48              | 0.04             | 95.95  | 3.00                                       | 5.91 | 0.03 | 6.66 | 1.15 | 0.01 | 1.10 | 0.12 | 0.47 | 0.01 | 18.46 | Schorl     |  |
| 20        | 10.38                         | 35.08            | 0.21             | 33.64                          | 11.06 | 0.05 | 3.51 | 0.18 | 1.67              | 0.06             | 95.83  | 3.00                                       | 5.87 | 0.03 | 6.64 | 1.55 | 0.01 | 0.88 | 0.03 | 0.54 | 0.01 | 18.56 | Schorl     |  |
| 21        | 10.42                         | 35.27            | 1.18             | 32.91                          | 9.94  | 0.04 | 3.69 | 0.77 | 1.76              | 0.07             | 96.05  | 3.00                                       | 5.88 | 0.15 | 6.47 | 1.39 | 0.01 | 0.92 | 0.14 | 0.57 | 0.01 | 18.53 | Schorl     |  |
| 22        | 10.38                         | 35.64            | 0.61             | 32.41                          | 9.76  | 0.06 | 4.17 | 0.52 | 1.82              | 0.04             | 95.40  | 3.00                                       | 5.97 | 0.08 | 6.40 | 1.37 | 0.01 | 1.04 | 0.09 | 0.59 | 0.01 | 18.55 | Schorl     |  |
| 23        | 10.42                         | 34.76            | 1.07             | 33.61                          | 10.82 | 0.05 | 3.12 | 0.70 | 1.87              | 0.04             | 96.45  | 3.00                                       | 5.80 | 0.13 | 6.61 | 1.51 | 0.01 | 0.78 | 0.13 | 0.60 | 0.01 | 18.57 | Schorl     |  |
| 24        | 10.10                         | 35.32            | 0.50             | 26.11                          | 13.02 | 0.15 | 6.67 | 1.83 | 1.85              | 0.06             | 95.61  | 3.00                                       | 6.08 | 0.06 | 5.30 | 1.87 | 0.02 | 1.71 | 0.34 | 0.62 | 0.01 | 19.02 | Schorl     |  |
| 25        | 10.39                         | 35.07            | 0.24             | 31.24                          | 7.74  | 0.06 | 7.13 | 1.97 | 1.43              | 0.10             | 95.36  | 3.00                                       | 5.87 | 0.03 | 6.16 | 1.08 | 0.01 | 1.78 | 0.35 | 0.46 | 0.02 | 18.76 | Dravite    |  |
| 26        | 10.51                         | 36.37            | 0.13             | 34.93                          | 10.18 | 0.08 | 2.26 | 0.08 | 1.39              | 0.04             | 95.95  | 3.00                                       | 6.02 | 0.02 | 6.81 | 1.41 | 0.01 | 0.56 | 0.01 | 0.44 | 0.01 | 18.29 | Schorl     |  |
| 27        | 10.58                         | 36.58            | 0.41             | 31.04                          | 2.35  | 0.03 | 9.98 | 1.56 | 1.99              | 0.04             | 94.56  | 3.00                                       | 6.01 | 0.05 | 6.01 | 0.32 | 0.00 | 2.45 | 0.27 | 0.63 | 0.01 | 18.76 | Dravite    |  |
| 28        | 10.51                         | 36.63            | 0.25             | 30.49                          | 6.24  | 0.02 | 8.35 | 0.63 | 2.35              | 0.02             | 95.49  | 3.00                                       | 6.06 | 0.03 | 5.94 | 0.86 | 0.00 | 2.06 | 0.11 | 0.75 | 0.00 | 18.82 | Dravite    |  |
| 29        | 10.43                         | 35.96            | 1.32             | 31.50                          | 9.09  | 0.04 | 5.04 | 0.37 | 1.99              | 0.02             | 95.76  | 3.00                                       | 5.99 | 0.17 | 6.18 | 1.27 | 0.01 | 1.25 | 0.07 | 0.64 | 0.00 | 18.57 | Schorl     |  |
| 30        | 10.37                         | 34.51            | 1.07             | 32.95                          | 10.64 | 0.09 | 3.67 | 0.89 | 1.88              | 0.05             | 96.10  | 3.00                                       | 5.79 | 0.13 | 6.51 | 1.49 | 0.01 | 0.92 | 0.16 | 0.61 | 0.01 | 18.63 | Schorl     |  |
| 31        | 10.41                         | 35.82            | 0.93             | 31.00                          | 9.53  | 0.09 | 5.27 | 1.02 | 2.00              | 0.04             | 96.11  | 3.00                                       | 5.98 | 0.12 | 6.10 | 1.33 | 0.01 | 1.31 | 0.18 | 0.65 | 0.01 | 18.68 | Schorl     |  |
| 32        | 10.13                         | 34.06            | 0.41             | 32.67                          | 14.98 | 0.15 | 0.67 | 0.45 | 2.18              | 0.06             | 95.74  | 3.00                                       | 5.84 | 0.05 | 6.61 | 2.15 | 0.02 | 0.17 | 0.08 | 0.72 | 0.01 | 18.67 | Schorl     |  |
| 33        | 10.44                         | 35.36            | 0.58             | 33.85                          | 10.62 | 0.11 | 3.04 | 0.29 | 1.94              | 0.04             | 96.26  | 3.00                                       | 5.89 | 0.07 | 6.64 | 1.48 | 0.02 | 0.75 | 0.05 | 0.63 | 0.01 | 18.54 | Schorl     |  |
| 34        | 10.32                         | 36.32            | 0.49             | 28.86                          | 4.58  | 0.03 | 8.89 | 2.48 | 1.40              | 0.06             | 93.41  | 3.00                                       | 6.11 | 0.06 | 5.73 | 0.64 | 0.00 | 2.23 | 0.45 | 0.46 | 0.01 | 18.70 | Dravite    |  |
| 35        | 10.15                         | 34.86            | 0.66             | 28.04                          | 9.56  | 0.04 | 6.87 | 3.26 | 0.95              | 0.12             | 94.50  | 3.00                                       | 5.97 | 0.09 | 5.66 | 1.37 | 0.01 | 1.75 | 0.60 | 0.32 | 0.03 | 18.78 | Uvite      |  |
| 36        | 10.09                         | 35.08            | 0.19             | 31.43                          | 12.10 | 0.06 | 2.55 | 0.42 | 1.82              | 0.06             | 93.81  | 3.00                                       | 6.04 | 0.02 | 6.38 | 1.74 | 0.01 | 0.65 | 0.08 | 0.61 | 0.01 | 18.55 | Schorl     |  |
| 37        | 10.24                         | 35.30            | 0.48             | 31.50                          | 8.33  | 0.07 | 5.11 | 0.86 | 1.82              | 0.03             | 93.74  | 3.00                                       | 5.99 | 0.06 | 6.30 | 1.18 | 0.01 | 1.29 | 0.16 | 0.60 | 0.01 | 18.60 | Dravite    |  |
| 38        | 10.09                         | 34.60            | 1.11             | 26.73                          | 9.15  | 0.01 | 7.96 | 3.25 | 1.05              | 0.07             | 94.03  | 3.00                                       | 5.96 | 0.14 | 5.43 | 1.32 | 0.00 | 2.04 | 0.60 | 0.35 | 0.02 | 18.86 | Uvite      |  |
| 39        | 10.22                         | 35.48            | 0.67             | 31.35                          | 8.11  | 0.02 | 5.04 | 0.30 | 2.11              | 0.06             | 93.35  | 3.00                                       | 6.03 | 0.09 | 6.28 | 1.15 | 0.00 | 1.28 | 0.05 | 0.69 | 0.01 | 18.59 | Dravite    |  |

| Grain No. | Weight %                      |                  |                  |                                |       |      |       |      |                   |                  |        | Atom per formula units based on 29 oxygens |      |      |      |      |      |      |      |      |      |       | Tourmaline |  |
|-----------|-------------------------------|------------------|------------------|--------------------------------|-------|------|-------|------|-------------------|------------------|--------|--------------------------------------------|------|------|------|------|------|------|------|------|------|-------|------------|--|
|           | B <sub>2</sub> O <sub>3</sub> | SiO <sub>2</sub> | TiO <sub>2</sub> | Al <sub>2</sub> O <sub>3</sub> | FeO   | MnO  | MgO   | CaO  | Na <sub>2</sub> O | K <sub>2</sub> O | Total% | B                                          | Si   | Ti   | Al   | Fe   | Mn   | Mg   | Ca   | Na   | K    | Total | Type       |  |
| 40        | 10.10                         | 35.11            | 0.17             | 30.09                          | 12.99 | 0.12 | 3.34  | 0.79 | 1.91              | 0.07             | 94.70  | 3.00                                       | 6.04 | 0.02 | 6.10 | 1.87 | 0.02 | 0.86 | 0.15 | 0.64 | 0.02 | 18.71 | Schorl     |  |
| 41        | 10.46                         | 36.40            | 0.85             | 32.41                          | 7.25  | 0.04 | 5.18  | 0.44 | 1.89              | 0.03             | 94.93  | 3.00                                       | 6.05 | 0.11 | 6.34 | 1.01 | 0.01 | 1.28 | 0.08 | 0.61 | 0.01 | 18.48 | Dravite    |  |
| 42        | 10.32                         | 35.57            | 0.63             | 32.59                          | 8.27  | 0.01 | 4.47  | 0.21 | 2.00              | 0.04             | 94.12  | 3.00                                       | 5.99 | 0.08 | 6.47 | 1.17 | 0.00 | 1.12 | 0.04 | 0.65 | 0.01 | 18.53 | Schorl     |  |
| 43        | 10.15                         | 35.63            | 0.05             | 25.68                          | 8.34  | 0.00 | 10.06 | 2.54 | 1.58              | 0.08             | 94.11  | 3.00                                       | 6.10 | 0.01 | 5.18 | 1.19 | 0.00 | 2.57 | 0.47 | 0.52 | 0.02 | 19.07 | Dravite    |  |
| 44        | 10.03                         | 34.57            | 0.74             | 28.13                          | 10.28 | 0.06 | 6.07  | 1.79 | 1.74              | 0.07             | 93.49  | 3.00                                       | 5.99 | 0.10 | 5.75 | 1.49 | 0.01 | 1.57 | 0.33 | 0.59 | 0.02 | 18.84 | Dravite    |  |
| 45        | 10.04                         | 34.97            | 0.38             | 29.54                          | 10.86 | 0.02 | 4.51  | 0.71 | 2.16              | 0.05             | 93.25  | 3.00                                       | 6.06 | 0.05 | 6.03 | 1.57 | 0.00 | 1.17 | 0.13 | 0.73 | 0.01 | 18.75 | Schorl     |  |
| 46        | 10.36                         | 35.49            | 0.02             | 31.04                          | 6.83  | 0.02 | 7.52  | 1.61 | 1.52              | 0.07             | 94.48  | 3.00                                       | 5.95 | 0.00 | 6.14 | 0.96 | 0.00 | 1.88 | 0.29 | 0.49 | 0.01 | 18.73 | Dravite    |  |
| 47        | 10.34                         | 36.00            | 0.18             | 30.59                          | 7.54  | 0.02 | 6.87  | 0.85 | 1.92              | 0.04             | 94.34  | 3.00                                       | 6.05 | 0.02 | 6.06 | 1.06 | 0.00 | 1.72 | 0.15 | 0.63 | 0.01 | 18.71 | Dravite    |  |
| 48        | 10.07                         | 34.11            | 0.29             | 32.33                          | 10.27 | 0.06 | 3.50  | 0.43 | 1.90              | 0.04             | 92.99  | 3.00                                       | 5.89 | 0.04 | 6.57 | 1.48 | 0.01 | 0.90 | 0.08 | 0.64 | 0.01 | 18.61 | Schorl     |  |
| 49        | 10.53                         | 35.87            | 0.58             | 33.49                          | 5.85  | 0.00 | 6.20  | 0.39 | 2.09              | 0.06             | 95.05  | 3.00                                       | 5.92 | 0.07 | 6.52 | 0.81 | 0.00 | 1.53 | 0.07 | 0.67 | 0.01 | 18.59 | Dravite    |  |
| 50        | 10.40                         | 35.77            | 0.35             | 31.37                          | 8.38  | 0.00 | 5.90  | 1.50 | 1.75              | 0.04             | 95.46  | 3.00                                       | 5.98 | 0.04 | 6.18 | 1.17 | 0.00 | 1.47 | 0.27 | 0.57 | 0.01 | 18.68 | Dravite    |  |
| 51        | 10.40                         | 35.80            | 0.39             | 29.54                          | 7.16  | 0.01 | 8.39  | 1.74 | 1.87              | 0.01             | 95.31  | 3.00                                       | 5.98 | 0.05 | 5.82 | 1.00 | 0.00 | 2.09 | 0.31 | 0.60 | 0.00 | 18.86 | Dravite    |  |
| 52        | 10.32                         | 34.97            | 0.99             | 32.25                          | 5.43  | 0.05 | 6.52  | 1.06 | 1.64              | 0.04             | 93.27  | 3.00                                       | 5.89 | 0.12 | 6.40 | 0.76 | 0.01 | 1.64 | 0.19 | 0.54 | 0.01 | 18.56 | Dravite    |  |
| 53        | 10.30                         | 35.65            | 1.12             | 30.60                          | 8.08  | 0.04 | 5.74  | 0.87 | 1.86              | 0.03             | 94.30  | 3.00                                       | 6.02 | 0.14 | 6.09 | 1.14 | 0.01 | 1.45 | 0.16 | 0.61 | 0.01 | 18.61 | Dravite    |  |
| 54        | 9.95                          | 34.10            | 1.04             | 28.70                          | 12.70 | 0.13 | 4.07  | 0.66 | 2.21              | 0.07             | 93.61  | 3.00                                       | 5.96 | 0.14 | 5.91 | 1.86 | 0.02 | 1.06 | 0.12 | 0.75 | 0.02 | 18.83 | Dravite    |  |
| 55        | 10.35                         | 34.30            | 1.06             | 33.14                          | 8.62  | 0.05 | 4.59  | 1.42 | 1.57              | 0.06             | 95.15  | 3.00                                       | 5.76 | 0.13 | 6.56 | 1.21 | 0.01 | 1.15 | 0.26 | 0.51 | 0.01 | 18.59 | Schorl     |  |
| 56        | 10.45                         | 35.87            | 0.40             | 32.32                          | 8.20  | 0.04 | 5.61  | 0.46 | 2.10              | 0.04             | 95.50  | 3.00                                       | 5.97 | 0.05 | 6.34 | 1.14 | 0.01 | 1.39 | 0.08 | 0.68 | 0.01 | 18.66 | Dravite    |  |
| 57        | 10.62                         | 36.12            | 0.60             | 33.91                          | 7.03  | 0.04 | 5.41  | 0.80 | 1.78              | 0.03             | 96.34  | 3.00                                       | 5.91 | 0.07 | 6.54 | 0.96 | 0.01 | 1.32 | 0.14 | 0.57 | 0.01 | 18.53 | Dravite    |  |
| 58        | 10.43                         | 36.16            | 0.71             | 29.57                          | 3.34  | 0.00 | 9.93  | 1.98 | 1.72              | 0.01             | 93.84  | 3.00                                       | 6.02 | 0.09 | 5.81 | 0.46 | 0.00 | 2.47 | 0.35 | 0.56 | 0.00 | 18.76 | Dravite    |  |
| 59        | 10.11                         | 34.56            | 0.29             | 32.82                          | 12.46 | 0.07 | 1.58  | 0.25 | 1.87              | 0.05             | 94.04  | 3.00                                       | 5.94 | 0.04 | 6.65 | 1.79 | 0.01 | 0.40 | 0.05 | 0.62 | 0.01 | 18.51 | Dravite    |  |
| 60        | 10.75                         | 36.68            | 0.69             | 33.62                          | 6.41  | 0.00 | 6.57  | 0.43 | 2.10              | 0.02             | 97.26  | 3.00                                       | 5.93 | 0.08 | 6.41 | 0.87 | 0.00 | 1.58 | 0.08 | 0.66 | 0.00 | 18.61 | Dravite    |  |
| 61        | 10.58                         | 36.38            | 0.74             | 32.30                          | 7.70  | 0.01 | 6.10  | 0.63 | 2.01              | 0.01             | 96.46  | 3.00                                       | 5.98 | 0.09 | 6.25 | 1.06 | 0.00 | 1.49 | 0.11 | 0.64 | 0.00 | 18.63 | Dravite    |  |
| 62        | 10.35                         | 35.55            | 0.44             | 32.61                          | 9.13  | 0.08 | 4.24  | 0.48 | 1.92              | 0.06             | 94.86  | 3.00                                       | 5.97 | 0.06 | 6.46 | 1.28 | 0.01 | 1.06 | 0.09 | 0.63 | 0.01 | 18.56 | Schorl     |  |
| 63        | 10.31                         | 35.84            | 0.82             | 28.13                          | 10.45 | 0.06 | 6.88  | 1.68 | 1.86              | 0.02             | 96.04  | 3.00                                       | 6.04 | 0.10 | 5.59 | 1.47 | 0.01 | 1.73 | 0.30 | 0.61 | 0.00 | 18.86 | Dravite    |  |
| 64        | 10.54                         | 35.84            | 0.99             | 30.80                          | 5.01  | 0.00 | 8.75  | 1.78 | 1.84              | 0.08             | 95.63  | 3.00                                       | 5.91 | 0.12 | 5.99 | 0.69 | 0.00 | 2.15 | 0.31 | 0.59 | 0.02 | 18.78 | Dravite    |  |
| 65        | 10.35                         | 35.41            | 0.83             | 32.24                          | 7.31  | 0.01 | 5.51  | 0.37 | 2.11              | 0.03             | 94.17  | 3.00                                       | 5.95 | 0.11 | 6.38 | 1.03 | 0.00 | 1.38 | 0.07 | 0.69 | 0.01 | 18.60 | Dravite    |  |
| 66        | 10.40                         | 35.01            | 1.42             | 31.38                          | 7.64  | 0.01 | 6.14  | 1.76 | 1.58              | 0.08             | 95.40  | 3.00                                       | 5.85 | 0.18 | 6.18 | 1.07 | 0.00 | 1.53 | 0.31 | 0.51 | 0.02 | 18.65 | Dravite    |  |
| 67        | 10.27                         | 35.55            | 0.80             | 31.17                          | 9.67  | 0.07 | 4.55  | 0.14 | 2.26              | 0.05             | 94.52  | 3.00                                       | 6.02 | 0.10 | 6.22 | 1.37 | 0.01 | 1.15 | 0.03 | 0.74 | 0.01 | 18.65 | Schorl     |  |
| 68        | 10.17                         | 34.21            | 0.70             | 31.95                          | 13.56 | 0.06 | 2.16  | 0.99 | 1.78              | 0.07             | 95.65  | 3.00                                       | 5.85 | 0.09 | 6.43 | 1.94 | 0.01 | 0.55 | 0.18 | 0.59 | 0.02 | 18.65 | Schorl     |  |
| Min       | 9.95                          | 34.06            | 0.02             | 25.68                          | 2.35  | 0.00 | 0.67  | 0.08 | 0.95              | 0.01             | 92.99  | 3.00                                       | 5.76 | 0.00 | 5.18 | 0.32 | 0.00 | 0.17 | 0.01 | 0.32 | 0.00 | 18.29 | Schorl     |  |
| Max       | 10.75                         | 37.09            | 1.42             | 34.93                          | 14.98 | 0.16 | 10.06 | 3.26 | 2.35              | 0.12             | 97.26  | 3.00                                       | 6.11 | 0.18 | 6.81 | 2.15 | 0.02 | 2.57 | 0.60 | 0.75 | 0.03 | 19.07 | Dravite    |  |
| Av        | 10.37                         | 35.53            | 0.65             | 31.47                          | 8.86  | 0.05 | 5.44  | 1.05 | 1.81              | 0.05             | 95.29  | 3.00                                       | 5.95 | 0.08 | 6.21 | 1.25 | 0.01 | 1.36 | 0.19 | 0.59 | 0.01 | 18.65 | Dravite    |  |

**Table 3** Tourmaline analyses from Tumbagoooda Sandstone, the Capricorn Orogen, Yilgarn Craton and the Pilbara Craton.

| Province/<br>Region                              | Area      | Craton/<br>Orogen | Oxide weight %                 |                  |       |      |                   | atom per formula unit (apfu) |      |      |      |      | apfu ratio     |                | Tourmaline<br>Type | Rock Type        | Reference     |
|--------------------------------------------------|-----------|-------------------|--------------------------------|------------------|-------|------|-------------------|------------------------------|------|------|------|------|----------------|----------------|--------------------|------------------|---------------|
|                                                  |           |                   | Al <sub>2</sub> O <sub>3</sub> | FeO <sub>i</sub> | MgO   | CaO  | Na <sub>2</sub> O | Al                           | Fe   | Mg   | Ca   | Na   | Fe/<br>(Fe+Mg) | Ca/<br>(Ca+Na) |                    |                  |               |
| Perth – Carnarvon Basins (Tumbagoooda Sandstone) | Red Bluff | Pinjarra          | 32.96                          | 3.41             | 8.28  | 0.56 | 2.11              | 6.30                         | 0.46 | 2.00 | 0.10 | 0.66 | 0.19           | 0.13           | Dravite            | Sandstone        | This study    |
|                                                  |           |                   | 34.75                          | 10.56            | 2.57  | 0.30 | 1.77              | 6.79                         | 1.46 | 0.64 | 0.05 | 0.57 | 0.70           | 0.08           | Schorl             |                  |               |
|                                                  |           |                   | 33.89                          | 6.44             | 6.04  | 1.55 | 1.53              | 6.53                         | 0.88 | 1.47 | 0.27 | 0.49 | 0.37           | 0.36           | Dravite            |                  |               |
|                                                  |           |                   | 32.86                          | 4.86             | 7.86  | 1.25 | 1.41              | 6.27                         | 0.66 | 1.90 | 0.22 | 0.44 | 0.26           | 0.33           | Dravite            |                  |               |
|                                                  |           |                   | 31.31                          | 10.41            | 4.55  | 0.98 | 1.82              | 6.15                         | 1.45 | 1.13 | 0.18 | 0.59 | 0.56           | 0.23           | Schorl             |                  |               |
|                                                  |           |                   | 33.89                          | 5.67             | 6.54  | 0.77 | 1.57              | 6.48                         | 0.77 | 1.58 | 0.13 | 0.50 | 0.33           | 0.21           | Dravite            |                  |               |
|                                                  |           |                   | 30.69                          | 6.48             | 7.92  | 1.30 | 1.99              | 5.95                         | 0.89 | 1.94 | 0.23 | 0.63 | 0.31           | 0.27           | Dravite            |                  |               |
|                                                  |           |                   | 33.18                          | 7.49             | 5.49  | 0.60 | 1.92              | 6.43                         | 1.03 | 1.34 | 0.11 | 0.61 | 0.43           | 0.15           | Dravite            |                  |               |
|                                                  |           |                   | 34.16                          | 8.55             | 4.15  | 0.95 | 1.36              | 6.64                         | 1.18 | 1.02 | 0.17 | 0.44 | 0.54           | 0.28           | Schorl             |                  |               |
|                                                  |           |                   | 33.98                          | 13.67            | 0.74  | 0.08 | 1.80              | 6.76                         | 1.93 | 0.19 | 0.01 | 0.59 | 0.91           | 0.02           | Schorl             |                  |               |
|                                                  |           |                   | 33.57                          | 8.24             | 5.21  | 0.63 | 1.92              | 6.46                         | 1.12 | 1.27 | 0.11 | 0.61 | 0.47           | 0.15           | Dravite            |                  |               |
|                                                  |           |                   | 30.11                          | 10.65            | 6.05  | 1.61 | 1.78              | 5.95                         | 1.49 | 1.51 | 0.29 | 0.58 | 0.50           | 0.33           | Dravite            |                  |               |
|                                                  |           |                   | 32.87                          | 10.91            | 2.79  | 0.56 | 1.94              | 6.51                         | 1.53 | 0.70 | 0.10 | 0.63 | 0.69           | 0.14           | Schorl             |                  |               |
|                                                  |           |                   | 30.99                          | 7.33             | 7.47  | 1.11 | 2.06              | 6.03                         | 1.01 | 1.84 | 0.20 | 0.66 | 0.35           | 0.23           | Dravite            |                  |               |
|                                                  |           |                   | 30.13                          | 7.70             | 7.19  | 1.52 | 1.87              | 5.90                         | 1.07 | 1.78 | 0.27 | 0.60 | 0.38           | 0.31           | Dravite            |                  |               |
|                                                  |           |                   | 27.54                          | 9.96             | 7.48  | 3.06 | 1.13              | 5.49                         | 1.41 | 1.89 | 0.55 | 0.37 | 0.43           | 0.60           | Uvite              |                  |               |
|                                                  |           |                   | 34.26                          | 9.09             | 4.03  | 0.11 | 2.14              | 6.62                         | 1.25 | 0.99 | 0.02 | 0.68 | 0.56           | 0.03           | Schorl             |                  |               |
|                                                  |           |                   | 31.11                          | 14.78            | 1.75  | 0.80 | 2.05              | 6.26                         | 2.11 | 0.45 | 0.15 | 0.68 | 0.82           | 0.18           | Schorl             |                  |               |
|                                                  |           |                   | 34.26                          | 8.35             | 4.47  | 0.67 | 1.48              | 6.66                         | 1.15 | 1.10 | 0.12 | 0.47 | 0.51           | 0.20           | Schorl             |                  |               |
|                                                  |           |                   | 33.64                          | 11.06            | 3.51  | 0.18 | 1.67              | 6.64                         | 1.55 | 0.88 | 0.03 | 0.54 | 0.64           | 0.05           | Schorl             |                  |               |
|                                                  |           |                   | 32.91                          | 9.94             | 3.69  | 0.77 | 1.76              | 6.47                         | 1.39 | 0.92 | 0.14 | 0.57 | 0.60           | 0.20           | Schorl             |                  |               |
|                                                  |           |                   | 32.41                          | 9.76             | 4.17  | 0.52 | 1.82              | 6.40                         | 1.37 | 1.04 | 0.09 | 0.59 | 0.57           | 0.13           | Schorl             |                  |               |
|                                                  |           |                   | 33.61                          | 10.82            | 3.12  | 0.70 | 1.87              | 6.61                         | 1.51 | 0.78 | 0.13 | 0.60 | 0.66           | 0.18           | Schorl             |                  |               |
|                                                  |           |                   | 26.11                          | 13.02            | 6.67  | 1.83 | 1.85              | 5.30                         | 1.87 | 1.71 | 0.34 | 0.62 | 0.52           | 0.35           | Schorl             |                  |               |
|                                                  |           |                   | 31.24                          | 7.74             | 7.13  | 1.97 | 1.43              | 6.16                         | 1.08 | 1.78 | 0.35 | 0.46 | 0.38           | 0.43           | Dravite            |                  |               |
|                                                  |           |                   | 34.93                          | 10.18            | 2.26  | 0.08 | 1.39              | 6.81                         | 1.41 | 0.56 | 0.01 | 0.44 | 0.72           | 0.02           | Schorl             |                  |               |
|                                                  |           |                   | 31.04                          | 2.35             | 9.98  | 1.56 | 1.99              | 6.01                         | 0.32 | 2.45 | 0.27 | 0.63 | 0.12           | 0.30           | Dravite            |                  |               |
|                                                  |           |                   | 30.49                          | 6.24             | 8.35  | 0.63 | 2.35              | 5.94                         | 0.86 | 2.06 | 0.11 | 0.75 | 0.29           | 0.13           | Dravite            |                  |               |
|                                                  |           |                   | 31.50                          | 9.09             | 5.04  | 0.37 | 1.99              | 6.18                         | 1.27 | 1.25 | 0.07 | 0.64 | 0.50           | 0.10           | Schorl             |                  |               |
|                                                  |           |                   | 32.95                          | 10.64            | 3.67  | 0.89 | 1.88              | 6.51                         | 1.49 | 0.92 | 0.16 | 0.61 | 0.62           | 0.21           | Schorl             |                  |               |
|                                                  |           |                   | 31.00                          | 9.53             | 5.27  | 1.02 | 2.00              | 6.10                         | 1.33 | 1.31 | 0.18 | 0.65 | 0.50           | 0.22           | Schorl             |                  |               |
|                                                  |           |                   | 32.67                          | 14.98            | 0.67  | 0.45 | 2.18              | 6.61                         | 2.15 | 0.17 | 0.08 | 0.72 | 0.93           | 0.10           | Schorl             |                  |               |
|                                                  |           |                   | 33.85                          | 10.62            | 3.04  | 0.29 | 1.94              | 6.64                         | 1.48 | 0.75 | 0.05 | 0.63 | 0.66           | 0.07           | Schorl             |                  |               |
|                                                  |           |                   | 28.86                          | 4.58             | 8.89  | 2.48 | 1.40              | 5.73                         | 0.64 | 2.23 | 0.45 | 0.46 | 0.22           | 0.49           | Dravite            |                  |               |
|                                                  |           |                   | 28.04                          | 9.56             | 6.87  | 3.26 | 0.95              | 5.66                         | 1.37 | 1.75 | 0.60 | 0.32 | 0.44           | 0.65           | Uvite              |                  |               |
|                                                  |           |                   | 31.43                          | 12.10            | 2.55  | 0.42 | 1.82              | 6.38                         | 1.74 | 0.65 | 0.08 | 0.61 | 0.73           | 0.12           | Schorl             |                  |               |
|                                                  |           |                   | 31.50                          | 8.33             | 5.11  | 0.86 | 1.82              | 6.30                         | 1.18 | 1.29 | 0.16 | 0.60 | 0.48           | 0.21           | Dravite            |                  |               |
|                                                  |           |                   | 26.73                          | 9.15             | 7.96  | 3.25 | 1.05              | 5.43                         | 1.32 | 2.04 | 0.60 | 0.35 | 0.39           | 0.63           | Uvite              |                  |               |
|                                                  |           |                   | 31.35                          | 8.11             | 5.04  | 0.30 | 2.11              | 6.28                         | 1.15 | 1.28 | 0.05 | 0.69 | 0.47           | 0.07           | Dravite            |                  |               |
|                                                  |           |                   | 30.09                          | 12.99            | 3.34  | 0.79 | 1.91              | 6.10                         | 1.87 | 0.86 | 0.15 | 0.64 | 0.68           | 0.19           | Schorl             |                  |               |
|                                                  |           |                   | 32.41                          | 7.25             | 5.18  | 0.44 | 1.89              | 6.34                         | 1.01 | 1.28 | 0.08 | 0.61 | 0.44           | 0.12           | Dravite            |                  |               |
|                                                  |           |                   | 32.59                          | 8.27             | 4.47  | 0.21 | 2.00              | 6.47                         | 1.17 | 1.12 | 0.04 | 0.65 | 0.51           | 0.06           | Schorl             |                  |               |
|                                                  |           |                   | 25.68                          | 8.34             | 10.06 | 2.54 | 1.58              | 5.18                         | 1.19 | 2.57 | 0.47 | 0.52 | 0.32           | 0.47           | Dravite            |                  |               |
|                                                  |           |                   | 28.13                          | 10.28            | 6.07  | 1.79 | 1.74              | 5.75                         | 1.49 | 1.57 | 0.33 | 0.59 | 0.49           | 0.36           | Dravite            |                  |               |
|                                                  |           |                   | 29.54                          | 10.86            | 4.51  | 0.71 | 2.16              | 6.03                         | 1.57 | 1.17 | 0.13 | 0.73 | 0.57           | 0.15           | Schorl             |                  |               |
|                                                  |           |                   | 31.04                          | 6.83             | 7.52  | 1.61 | 1.52              | 6.14                         | 0.96 | 1.88 | 0.29 | 0.49 | 0.34           | 0.37           | Dravite            |                  |               |
|                                                  |           |                   | 30.59                          | 7.54             | 6.87  | 0.85 | 1.92              | 6.06                         | 1.06 | 1.72 | 0.15 | 0.63 | 0.38           | 0.19           | Dravite            |                  |               |
|                                                  |           |                   | 32.33                          | 10.27            | 3.50  | 0.43 | 1.90              | 6.57                         | 1.48 | 0.90 | 0.08 | 0.64 | 0.62           | 0.11           | Schorl             |                  |               |
|                                                  |           |                   | 33.49                          | 5.85             | 6.20  | 0.39 | 2.09              | 6.52                         | 0.81 | 1.53 | 0.07 | 0.67 | 0.35           | 0.09           | Dravite            |                  |               |
|                                                  |           |                   | 31.37                          | 8.38             | 5.90  | 1.50 | 1.75              | 6.18                         | 1.17 | 1.47 | 0.27 | 0.57 | 0.44           | 0.32           | Dravite            |                  |               |
|                                                  |           |                   | 29.54                          | 7.16             | 8.39  | 1.74 | 1.87              | 5.82                         | 1.00 | 2.09 | 0.31 | 0.60 | 0.32           | 0.34           | Dravite            |                  |               |
|                                                  |           |                   | 32.25                          | 5.43             | 6.52  | 1.06 | 1.64              | 6.40                         | 0.76 | 1.64 | 0.19 | 0.54 | 0.32           | 0.26           | Dravite            |                  |               |
|                                                  |           |                   | 30.60                          | 8.08             | 5.74  | 0.87 | 1.86              | 6.09                         | 1.14 | 1.45 | 0.16 | 0.61 | 0.44           | 0.21           | Dravite            |                  |               |
|                                                  |           |                   | 28.70                          | 12.70            | 4.07  | 0.66 | 2.21              | 5.91                         | 1.86 | 1.06 | 0.12 | 0.75 | 0.64           | 0.14           | Dravite            |                  |               |
|                                                  |           |                   | 33.14                          | 8.62             | 4.59  | 1.42 | 1.57              | 6.56                         | 1.21 | 1.15 | 0.26 | 0.51 | 0.51           | 0.34           | Schorl             |                  |               |
|                                                  |           |                   | 32.32                          | 8.20             | 5.61  | 0.46 | 2.10              | 6.34                         | 1.14 | 1.39 | 0.08 | 0.68 | 0.45           | 0.11           | Dravite            |                  |               |
|                                                  |           |                   | 33.91                          | 7.03             | 5.41  | 0.80 | 1.78              | 6.54                         | 0.96 | 1.32 | 0.14 | 0.57 | 0.42           | 0.20           | Dravite            |                  |               |
|                                                  |           |                   | 29.57                          | 3.34             | 9.93  | 1.98 | 1.72              | 5.81                         | 0.46 | 2.47 | 0.35 | 0.56 | 0.16           | 0.38           | Dravite            |                  |               |
|                                                  |           |                   | 32.82                          | 12.46            | 1.58  | 0.25 | 1.87              | 6.65                         | 1.79 | 0.40 | 0.05 | 0.62 | 0.82           | 0.07           | Dravite            |                  |               |
|                                                  |           |                   | 33.62                          | 6.41             | 6.57  | 0.43 | 2.10              | 6.41                         | 0.87 | 1.58 | 0.08 | 0.66 | 0.36           | 0.11           | Dravite            |                  |               |
|                                                  |           |                   | 32.30                          | 7.70             | 6.10  | 0.63 | 2.01              | 6.25                         | 1.06 | 1.49 | 0.11 | 0.64 | 0.42           | 0.15           | Dravite            |                  |               |
|                                                  |           |                   | 32.61                          | 9.13             | 4.24  | 0.48 | 1.92              | 6.46                         | 1.28 | 1.06 | 0.09 | 0.63 | 0.55           | 0.13           | Schorl             |                  |               |
|                                                  |           |                   | 28.13                          | 10.45            | 6.88  | 1.68 | 1.86              | 5.59                         | 1.47 | 1.73 | 0.30 | 0.61 | 0.46           | 0.33           | Dravite            |                  |               |
|                                                  |           |                   | 30.80                          | 5.01             | 8.75  | 1.78 | 1.84              | 5.99                         | 0.69 | 2.15 | 0.31 | 0.59 | 0.24           | 0.34           | Dravite            |                  |               |
|                                                  |           |                   | 32.24                          | 7.31             | 5.51  | 0.37 | 2.11              | 6.38                         | 1.03 | 1.38 | 0.07 | 0.69 | 0.43           | 0.09           | Dravite            |                  |               |
|                                                  |           |                   | 31.38                          | 7.64             | 6.14  | 1.76 | 1.58              | 6.18                         | 1.07 | 1.53 | 0.31 | 0.51 | 0.41           | 0.38           | Dravite            |                  |               |
|                                                  |           |                   | 31.17                          | 9.67             | 4.55  | 0.14 | 2.26              | 6.22                         | 1.37 | 1.15 | 0.03 | 0.74 | 0.54           | 0.04           | Schorl             |                  |               |
|                                                  |           |                   | 31.95                          | 13.56            | 2.16  | 0.99 | 1.78              | 6.43                         | 1.94 | 0.55 | 0.18 | 0.59 | 0.78           | 0.23           | Schorl             |                  |               |
| Gascoyne                                         |           | Capricorn         | 31.63                          | 13.07            | 3.59  | 0.44 | 2.08              | 5.57                         | 1.63 | 0.80 | 0.07 | 0.60 | 0.67           | 0.10           | Schorl             | Scrubber granite | Shewfelt 2005 |
|                                                  |           |                   | 31.25                          | 13.09            | 3.70  | 0.48 | 2.15              | 5.59                         | 1.66 | 0.84 | 0.08 | 0.63 | 0.66           | 0.11           | Schorl             |                  |               |
|                                                  |           |                   | 31.14                          | 13.47            | 3.26  | 0.40 | 2.12              | 5.59                         | 1.72 | 0.74 | 0.07 | 0.63 | 0.70           | 0.10           | Schorl             |                  |               |
|                                                  |           |                   | 31.49                          | 12.52            | 2.78  | 0.45 | 2.05              | 5.70                         | 1.61 | 0.64 | 0.07 | 0.61 | 0.72           | 0.10           | Schorl             |                  |               |
|                                                  |           |                   |                                |                  |       |      |                   |                              |      |      |      |      |                |                |                    |                  |               |
